# Supplementary material
Source: publisher figshare collection journal article supplement (https://tandf.figshare.com/ndownloader/files/17720762)
Supplement: Supplementary file 1 [file 17720762]

**Supplementary Material**

**Organic acids and alcohols quantification by HPLC/RID in sugarcane vinasse: Analytical method validation and matrix effects assessment**

Alan Nascimento Bernardes1; Leandro Augusto Gouvêa de Godói1; Priscila Rosseto Camiloti1; Absai da Conceição Gomes2; Bruna Larissa Sandy Sanchez1; Ana Paula Rodrigues Torres2; Lívia Silva Botta1

1 Ergostech Renewable Energy Solutions. Estrada da Rhodia km 16, Vila Holândia, 13084-970, Campinas, SP, Brazil.

2 Petrobras Research and Development Center (CENPES), Management of Biotechnology, Av. Horácio Macedo, 950, Cidade Universitária, 21941-915, Ilha do Fundão, Rio de Janeiro, RJ, Brazil.

**Description:**

This section shows complementary information on the validation studies. The calibration curves obtained for each analyte of interest by external standardization were shown in comparison with the calibration curves obtained by the standard addition method (Figure S1).

**Figure S1:** Calibration curves obtained by external standardization (shown as circles) and by standard addition (shown as diamonds) methods for each analyte measured by means of the validated chromatographic method:

| **a)** | 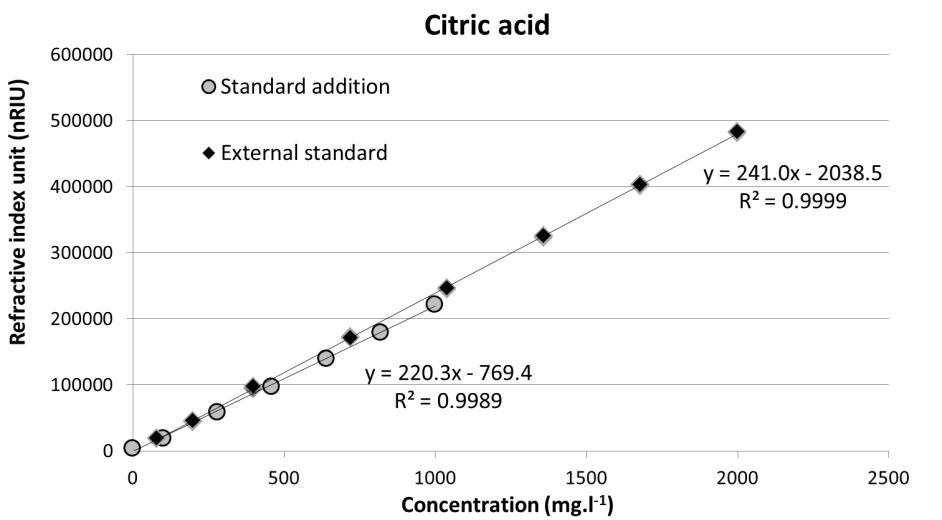 |
| --- | --- |
| **b)** | 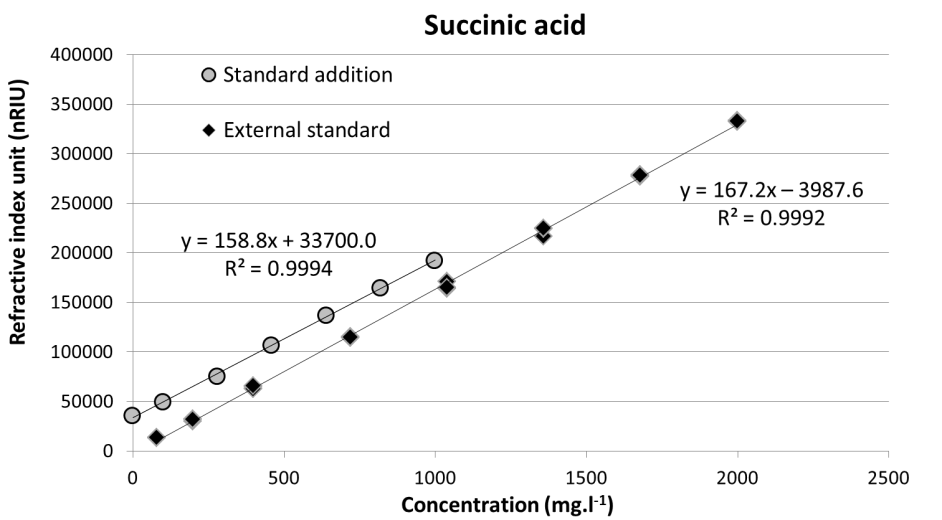 |
| **c)** | 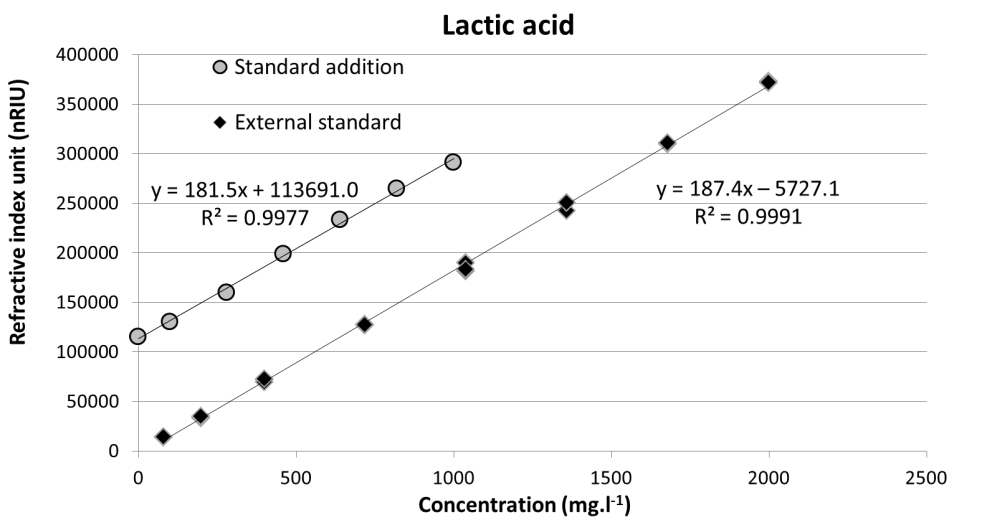 |
| **d)** | 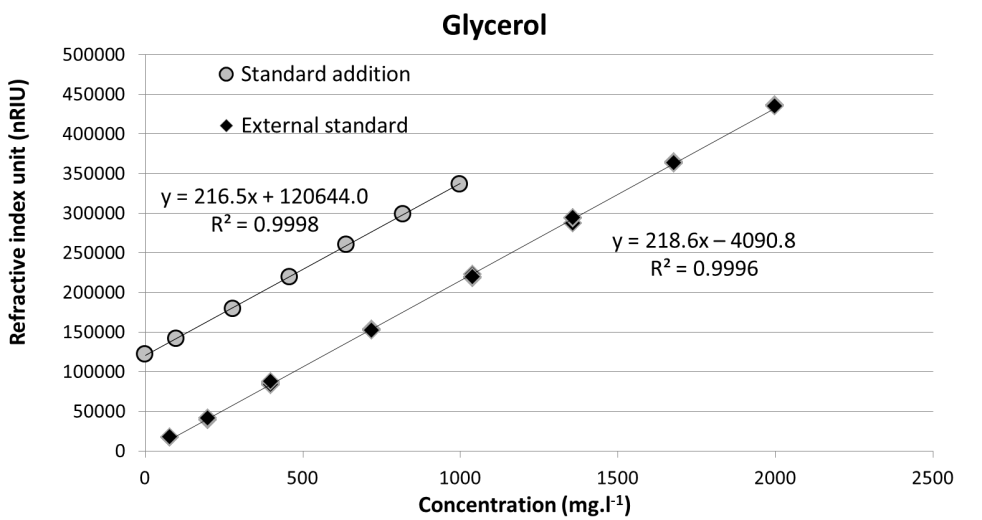 |
| **e)** | 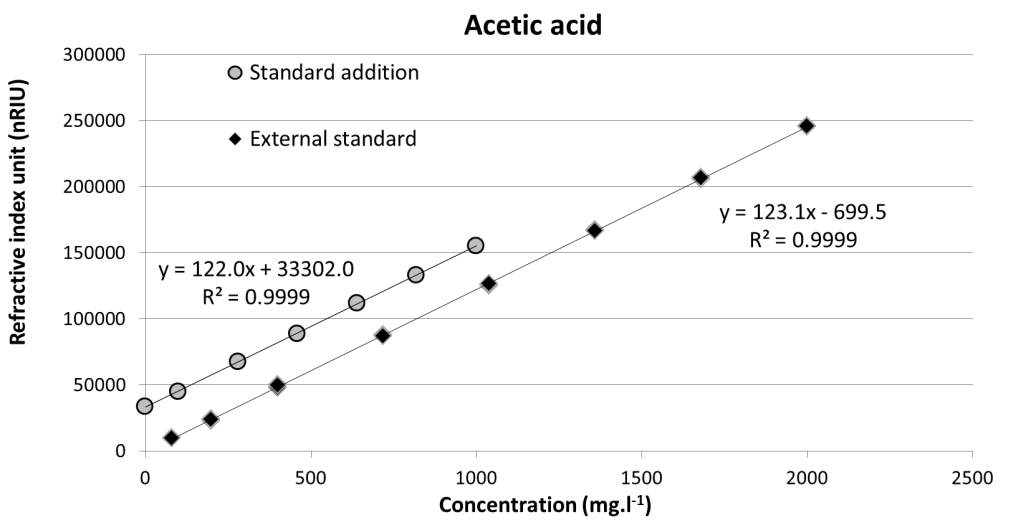 |
| **f)** | 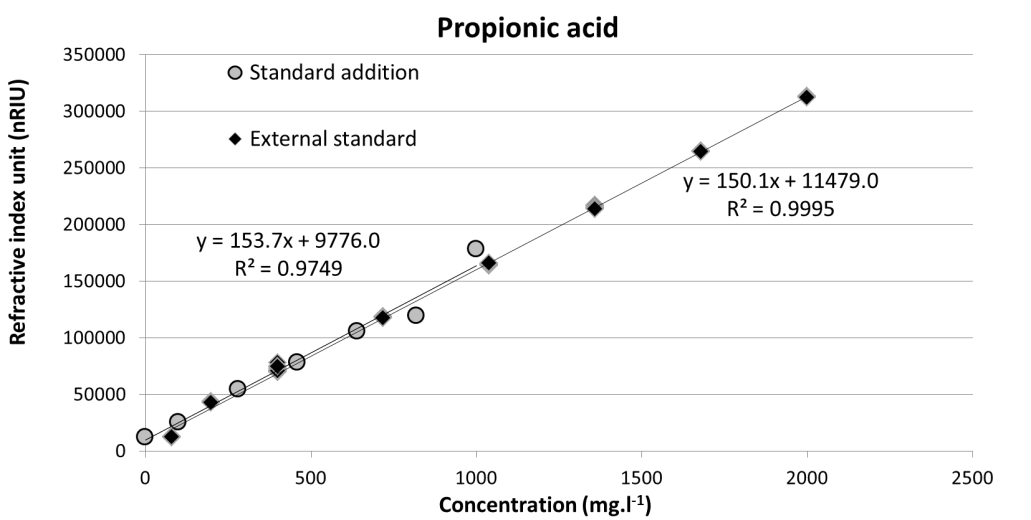 |
| **g)** | 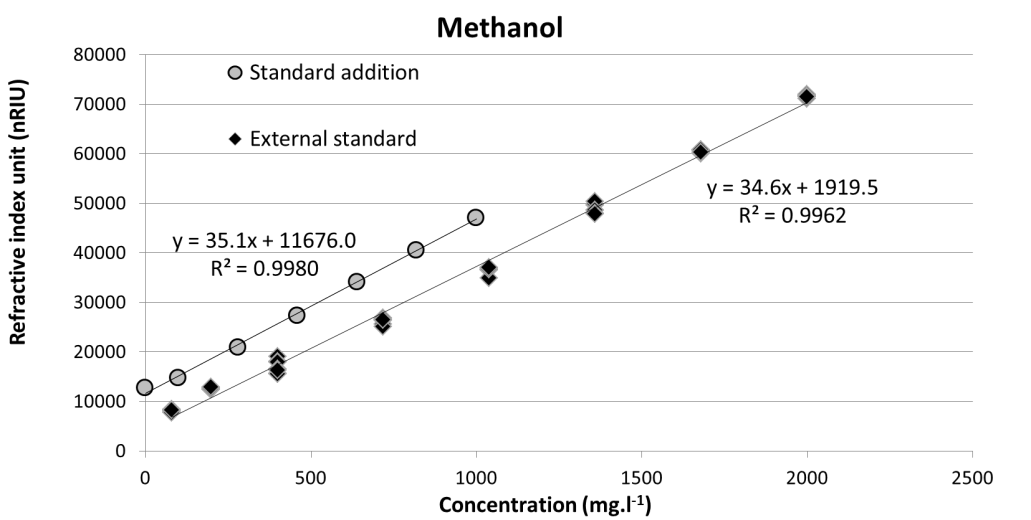 |
| **h)** | 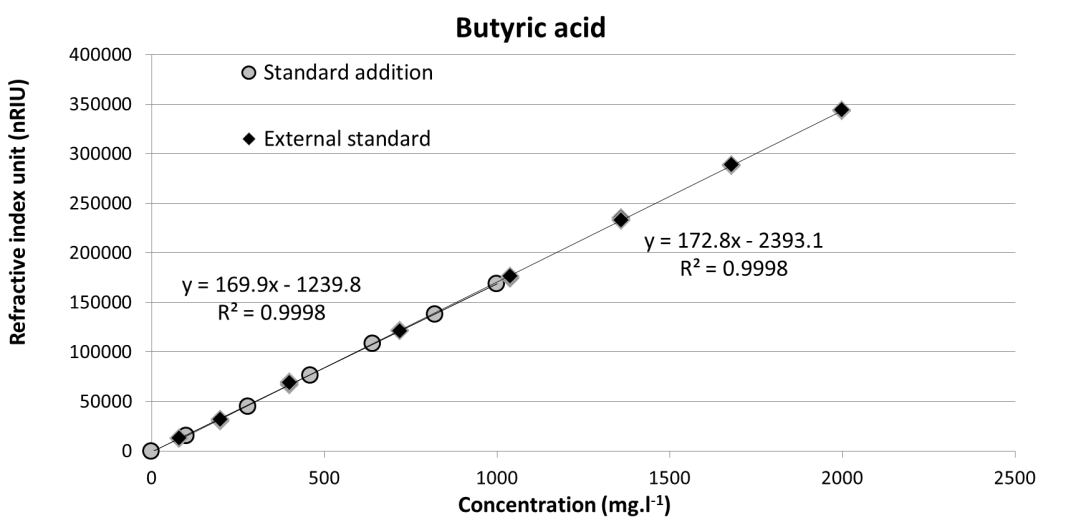 |
| **i)** | 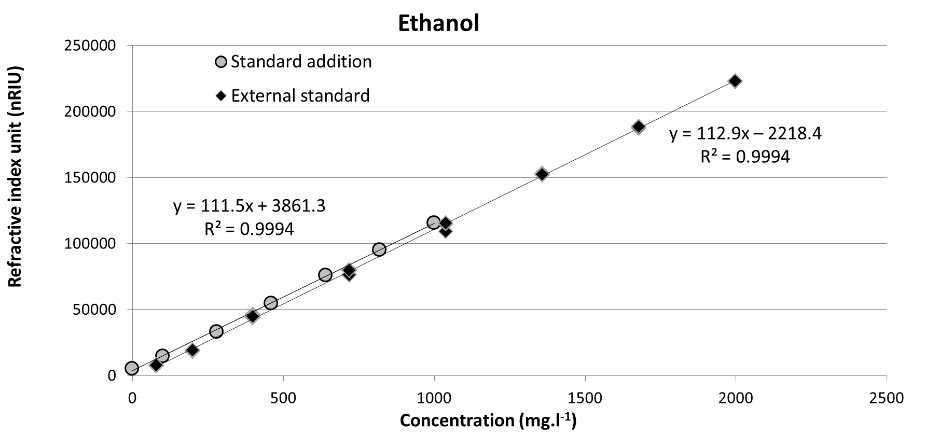 |
| **j)** | 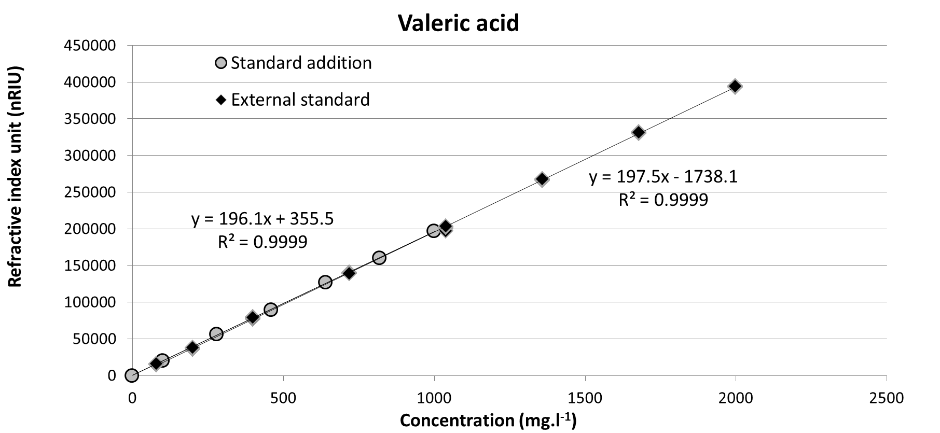 |
| **k)** | 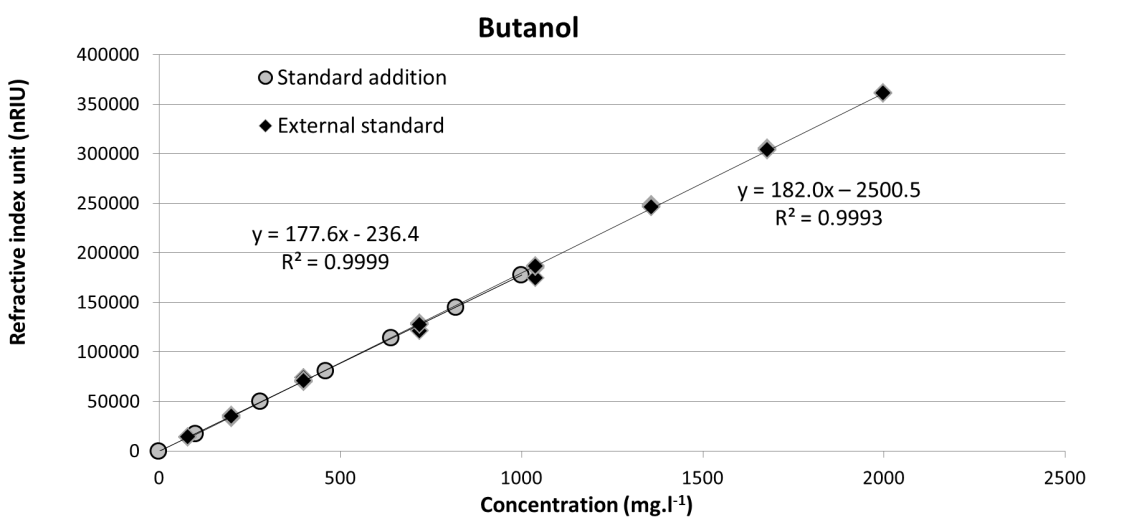 |
| **l)** | 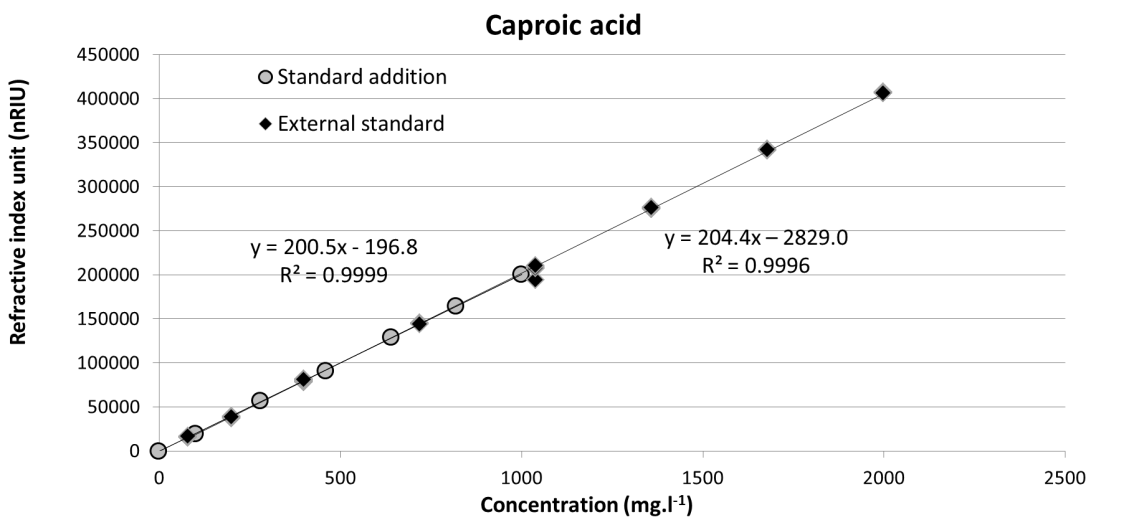 |
